# Supplementary material
Source: publisher site journal article supplement (https://www.spandidos-publications.com/2135/downloadSupplementary)
Supplement: Supplementary file 1 [file downloadSupplementary]

## Sheet: Supplementary table I
		Table SI. Differentially expressed proteins.
NO	Accession	ID	Gene Symbol	Description	Coverage	# Peptides	# Peptide Spectrum Match. (PSMs)	# Unique Peptides	# Protein Groups	# Amino Acids （AAs）	Molecular Weight (kDa)	calc. pI	Exponentially Modified Protein Abundance Index （emPAI）	Score Sequest HT	Fold change
1	IPI00022078.3	Q92597	NDRG1	Protein NDRG1	3.5533	1	1	1	1	394	42.808	5.82	0.145	1.89041	1.88
2	IPI00001560.2	P42771	CDKN2A	cyclin-dependent kinase inhibitor 2A isoform 5	7.18563	1	1	1	1	167	17.872	6.89	0.292	0	1.86
3	IPI00017450.2	P35269	GTF2F1	General transcription factor IIF subunit 1	3.09478	1	1	1	1	517	58.205	7.49	0.093	0	1.8
4	IPI00472442.4	P25786	PSMA1	Isoform Long of Proteasome subunit alpha type-1	16.7286	4	5	4	1	269	30.22	6.99	0.624	8.96988	1.74
5	IPI00647635.3	Q6Y7W6	GIGYF2	Isoform 2 of PERQ amino acid-rich with GYF domain-containing protein 2	0.984103	1	1	1	1	1321	152.434	5.6	0.038	0	1.72
6	IPI00022827.1	Q9H2G2	SLK	Isoform 1 of STE20-like serine/threonine-protein kinase	0.647773	1	1	1	1	1235	142.607	5.15	0.032	2.13129	1.69
7	IPI00328293.3	Q8IYB3	SRRM1	cDNA FLJ61739, highly similar to Serine/arginine repetitive matrix protein 1	1.0917	1	1	1	1	916	103.735	11.82	0.044	2.75329	1.69
8	IPI00921996.1	P16949	STMN1	Isoform 2 of Stathmin	24.7126	5	6	5	1	174	19.811	7.02	4.623	16.9268	1.67
9	IPI00013455.8	P30622	CLIP1	Isoform 1 of CAP-Gly domain-containing linker protein 1	0.69541	1	1	1	1	1438	162.147	5.36	0.022	0	1.66
10	IPI00031697.1	Q9BVC6	TMEM109	Transmembrane protein 109	3.7037	1	1	1	1	243	26.194	10.48	0.233	3.69538	1.61
11	IPI00101968.3	Q9UJU6	DBNL	Isoform 3 of Drebrin-like protein	5.46697	2	2	1	1	439	49.012	5.05	0.202	4.84487	1.6
12	IPI00328737.2	Q86UK7	ZNF598	Isoform 1 of Zinc finger protein 598	1.32743	1	1	1	1	904	98.575	8.4	0.044	2.16489	1.6
13	IPI00013895.1	P31949	S100A11	Protein S100-A11	15.2381	2	3	2	1	105	11.733	7.12	0.931	6.09196	1.58
14	IPI00027175.1	P30626	SRI	Sorcin	5.55556	1	1	1	1	198	21.662	5.59	0.212	1.8691	1.57
15	IPI00183002.6	O14974	PPP1R12A	Isoform 1 of Protein phosphatase 1 regulatory subunit 12A	0.873786	1	1	1	1	1030	115.211	5.4	0.042	1.9396	1.54
16	IPI00021370.1	P61086	UBE2K	Isoform 1 of Ubiquitin-conjugating enzyme E2 K	7.5	1	1	1	1	200	22.393	5.44	0.179	2.32336	1.53
17	IPI00027463.1	P06703	S100A6	Protein S100-A6	8.88889	1	1	1	1	90	10.173	5.48	0.585	2.67922	1.52
18	IPI00647915.1	P37802	TAGLN2	24 kDa protein	5	1	3	1	1	220	24.438	8.25	0.359	6.12083	1.51
19	IPI00297084.7	P39656	DDOST	Dolichyl-diphosphooligosaccharide--protein glycosyltransferase 48 kDa subunit	2.41228	1	2	1	1	456	50.769	6.55	0.202	2.76695	0.74
20	IPI00871988.2	Q9BWM7	SFXN3	cDNA FLJ58980, highly similar to Sideroflexin-3	4.55927	1	3	1	1	329	36.327	9.01	0.222	4.20765	0.74
21	IPI00171626.3	Q8NF37	LPCAT1	Lysophosphatidylcholine acyltransferase 1	2.43446	1	2	1	1	534	59.113	6.02	0.089	2.63116	0.74
22	IPI00852927.2	P53007	SLC25A1	Plasma membrane citrate carrier	2.51572	1	1	1	1	318	35.03	9.99	0.129	2.67381	0.74
23	IPI00909026.1	Q7Z2W9	MRPL21	cDNA FLJ52689, highly similar to Homo sapiens mitochondrial ribosomal protein L21 (MRPL21), transcript variant 4, mRNA	2.85714	1	1	1	1	280	30.575	10.46	0.145	2.87388	0.74
24	IPI00100656.3	Q9NZ01	TECR	Isoform 1 of Trans-2,3-enoyl-CoA reductase	3.24675	1	2	1	1	308	36.011	9.45	0.136	2.08731	0.74
25	IPI00922223.2	P61421	ATP6V0D1	Uncharacterized protein	2.04082	1	1	1	1	392	44.631	5.14	0.122	3.11981	0.74
26	IPI00000690.1	O95831	AIFM1	Isoform 1 of Apoptosis-inducing factor 1, mitochondrial	9.46166	5	7	5	1	613	66.859	8.95	0.417	6.35536	0.74
27	IPI00031131.4	Q9HDC9	C20orf3	Isoform 1 of Adipocyte plasma membrane-associated protein	2.16346	1	1	1	1	416	46.451	6.16	0.101	2.31567	0.74
28	IPI00024934.5	P22033	MUT	Methylmalonyl-CoA mutase, mitochondrial	1.06667	1	1	1	1	750	83.082	6.93	0.058	0	0.74
29	IPI00306301.2	P08559	PDHA1	pyruvate dehydrogenase E1 component subunit alpha, somatic form, mitochondrial isoform 2 precursor	7.24299	3	4	3	1	428	47.549	8.54	0.259	9.16305	0.74
30	IPI00923468.2	P51532	SMARCA4	Uncharacterized protein	0.475907	1	1	1	1	1681	188.742	8.12	0.029	2.05149	0.74
31	IPI00022334.1	P04181	OAT	Ornithine aminotransferase, mitochondrial	5.01139	2	2	2	1	439	48.504	7.03	0.186	3.18003	0.73
32	IPI00303300.3	Q96AY3	FKBP10	Peptidyl-prolyl cis-trans isomerase FKBP10	8.24742	6	7	5	1	582	64.204	5.62	0.453	14.0182	0.73
33	IPI00218019.1	P35613	BSG	Isoform 1 of Basigin	6.49351	3	3	3	1	385	42.174	5.66	0.413	7.18905	0.73
34	IPI00003807.7	P11117	ACP2	Lysosomal acid phosphatase	2.60047	1	1	1	1	423	48.313	6.74	0.105	2.65773	0.73
35	IPI00015911.2	P09622	DLD	Dihydrolipoyl dehydrogenase, mitochondrial	8.25147	4	5	4	1	509	54.143	7.85	0.359	10.0128	0.73
36	IPI00015102.2	Q13740	ALCAM	Isoform 1 of CD166 antigen	4.11664	2	3	2	1	583	65.061	6.25	0.241	2.28181	0.73
37	IPI00306604.5	P08648	ITGA5	Integrin alpha-5	1.3346	1	1	1	1	1049	114.465	5.77	0.053	0	0.73
38	IPI00297492.2	P46977	STT3A	Dolichyl-diphosphooligosaccharide--protein glycosyltransferase subunit STT3A	1.56028	1	1	1	1	705	80.477	8.07	0.061	3.28813	0.73
39	IPI00945633.1	C9JBX5	SSR1	Uncharacterized protein	3.69128	1	2	1	1	298	33.866	4.69	0.212	2.3273	0.73
40	IPI00289601.10	Q92769	HDAC2	Histone deacetylase 2	3.43643	2	2	1	1	582	65.496	6.99	0.145	2.012	0.73
41	IPI00908404.2	P15586	GNS	cDNA FLJ51188, highly similar to N-acetylglucosamine-6-sulfatase	2.05479	1	1	1	1	584	65.668	7.97	0.077	0	0.73
42	IPI00792743.1	Q9NWH9	SLTM	SAFB-like transcription modulator	0.967118	1	1	1	1	1034	117.079	7.87	0.044	0	0.73
43	IPI00011416.2	Q13011	ECH1	Delta(3,5)-Delta(2,4)-dienoyl-CoA isomerase, mitochondrial	5.79268	2	2	2	1	328	35.793	8	0.233	5.49322	0.72
44	IPI00332157.2	Q6P161	MRPL54	39S ribosomal protein L54, mitochondrial	7.24638	1	2	1	1	138	15.809	9.6	0.468	0	0.72
45	IPI00101664.3	Q96I59	NARS2	Probable asparaginyl-tRNA synthetase, mitochondrial	2.51572	1	1	1	1	477	54.056	7.24	0.08	3.02066	0.72
46	IPI00027448.3	O75964	ATP5L	ATP synthase subunit g, mitochondrial	12.6214	1	1	1	1	103	11.421	9.64	0.334	2.34541	0.72
47	IPI00031801.4	P16989	CSDA	Isoform 1 of DNA-binding protein A	5.10753	1	1	1	1	372	40.066	9.77	0.122	2.0298	0.72
48	IPI00032140.4	P50454	SERPINH1	Serpin H1	5.74163	2	2	2	1	418	46.411	8.69	0.202	3.58328	0.72
49	IPI00926109.1	Q7L2E3	DHX30	Isoform 2 of Putative ATP-dependent RNA helicase DHX30	1.14566	1	1	1	1	1222	136.03	8.6	0.028	0	0.72
50	IPI00215687.1	O94925	GLS	Isoform 3 of Glutaminase kidney isoform, mitochondrial	6.68896	3	4	3	1	598	65.418	7.88	0.212	4.69702	0.72
51	IPI00069084.2	Q9Y4A5	TRRAP	Isoform 1 of Transformation/transcription domain-associated protein	0.285048	1	1	1	1	3859	437.318	8.19	0.009	0	0.72
52	IPI00027107.5	P49411	TUFM	elongation factor Tu, mitochondrial precursor	8.79121	4	6	4	1	455	49.843	7.61	0.334	11.6705	0.71
53	IPI00029046.1	Q14165	MLEC	Malectin	4.45205	1	1	1	1	292	32.214	5.41	0.122	0	0.71
54	IPI00220687.1	Q8TCT9	HM13	Isoform 2 of Minor histocompatibility antigen H13	4.92958	2	3	2	1	426	46.795	7.23	0.292	2.12793	0.71
55	IPI00174190.3	Q8WUK0	PTPMT1	Isoform 1 of Protein-tyrosine phosphatase mitochondrial 1	4.47761	1	1	1	1	201	22.829	9.77	0.179	0	0.71
56	IPI00848334.1	O00139	KIF2A	Isoform 4 of Kinesin-like protein KIF2A	1.47849	1	1	1	1	744	84.037	6.37	0.05	0	0.71
57	IPI00103509.4	O95299	NDUFA10	Uncharacterized protein	1.8648	1	1	1	1	429	48.532	7.21	0.086	2.05701	0.71
58	IPI00014230.1	Q07021	C1QBP	Complement component 1 Q subcomponent-binding protein, mitochondrial	4.60993	1	1	1	1	282	31.343	4.84	0.166	1.86146	0.7
59	IPI00218433.6	P13498	CYBA	Cytochrome b-245 light chain	7.69231	1	1	1	1	195	20.999	9.54	0.259	0	0.7
60	IPI00300094.6	Q9H089	LSG1	Large subunit GTPase 1 homolog	1.51976	1	1	1	1	658	75.178	6.38	0.054	0	0.7
61	IPI00297211.1	O60264	SMARCA5	SWI/SNF-related matrix-associated actin-dependent regulator of chromatin subfamily A member 5	1.71103	2	2	2	1	1052	121.828	8.09	0.07	4.34437	0.7
62	IPI00299150.4	P25774	CTSS	Cathepsin S	3.32326	1	1	1	1	331	37.471	8.34	0.116	1.77087	0.7
63	IPI00909465.2	Q9P0J0	NDUFA13;YJEFN3	cDNA FLJ58045, highly similar to NADH dehydrogenase (ubiquinone) 1 alpha subcomplex subunit 13	3.2967	1	1	1	1	273	30.076	6.9	0.155	2.76616	0.7
64	IPI00336016.3	Q9HA77	CARS2	Probable cysteinyl-tRNA synthetase, mitochondrial	1.95035	1	2	1	1	564	62.185	8.34	0.086	5.53009	0.7
65	IPI00019157.3	Q6UVK1	CSPG4	Chondroitin sulfate proteoglycan 4	0.559862	1	1	1	1	2322	250.382	5.47	0.023	2.10403	0.69
66	IPI00291755.6	Q8TEM1	NUP210	Isoform 1 of Nuclear pore membrane glycoprotein 210	0.582936	1	2	1	1	1887	204.983	6.81	0.027	4.89688	0.69
67	IPI00007940.6	O75477	ERLIN1	erlin-1	11.4943	4	4	4	1	348	39.146	7.87	0.445	6.9255	0.69
68	IPI00006957.3	Q9Y394	DHRS7	Isoform 1 of Dehydrogenase/reductase SDR family member 7	3.24484	1	1	1	1	339	38.274	8.32	0.129	1.6123	0.69
69	IPI00026689.4	P06493	CDK1	Putative uncharacterized protein DKFZp686L20222	4.62046	1	1	1	1	303	34.756	8.95	0.116	0	0.69
70	IPI00747849.2	P05026	ATP1B1	Isoform 1 of Sodium/potassium-transporting ATPase subunit beta-1	3.63036	1	1	1	1	303	35.039	8.53	0.145	1.86472	0.69
71	IPI00294610.4	Q96EY1	DNAJA3	Isoform 1 of DnaJ homolog subfamily A member 3, mitochondrial	2.5	1	1	1	1	480	52.456	9.26	0.093	0	0.69
72	IPI00303954.3	O43169	CYB5B	cytochrome b5 type B precursor	8	1	1	1	1	150	16.684	4.97	0.292	1.95716	0.69
73	IPI00744711.2	Q8TCS8	PNPT1	Polyribonucleotide nucleotidyltransferase 1, mitochondrial	1.66028	1	1	1	1	783	85.897	7.77	0.044	0	0.69
74	IPI00941649.1	O43390	HNRNPR	Uncharacterized protein	5.02355	3	4	1	1	637	71.269	8.13	0.184	10.9731	0.69
75	IPI00000877.1	Q9Y4L1	HYOU1	Hypoxia up-regulated protein 1	4.8048	4	5	4	1	999	111.266	5.22	0.166	9.38419	0.69
76	IPI00419844.3	Q53GS9	USP39	U4/U6.U5 tri-snRNP-associated protein 2	3.89381	2	3	2	1	565	65.34	8.91	0.155	0	0.69
77	IPI00413611.1	P11387	TOP1	DNA topoisomerase 1	4.44444	3	4	3	1	765	90.669	9.31	0.158	4.23261	0.68
78	IPI00165506.4	Q9Y2S7	POLDIP2	Polymerase delta-interacting protein 2	4.34783	1	1	1	1	368	42.007	8.63	0.089	0	0.68
79	IPI00003766.4	O95571	ETHE1	Protein ETHE1, mitochondrial	5.51181	1	3	1	1	254	27.855	6.83	0.334	0	0.68
80	IPI00291006.2	P40926	MDH2	Malate dehydrogenase, mitochondrial	7.39645	3	4	3	1	338	35.481	8.68	0.318	10.0075	0.68
81	IPI00396260.1	Q9NWT8	AURKAIP1	Aurora kinase A-interacting protein	5.02513	1	1	1	1	199	22.34	10.76	0.334	1.79923	0.68
82	IPI00025366.4	O75390	CS	Citrate synthase, mitochondrial	5.5794	2	3	2	1	466	51.68	8.32	0.222	3.94532	0.68
83	IPI00019004.1	Q99442	SEC62	Translocation protein SEC62	3.00752	1	1	1	1	399	45.833	7.12	0.129	2.89487	0.68
84	IPI00027252.6	Q99623	PHB2	Prohibitin-2	12.709	4	9	4	1	299	33.276	9.83	0.425	22.0776	0.67
85	IPI00008728.1	O76031	CLPX	ATP-dependent Clp protease ATP-binding subunit clpX-like, mitochondrial	3.15956	2	2	2	1	633	69.181	7.58	0.11	4.63286	0.67
86	IPI00260715.5	P35637	FUS	Fus-like protein (Fragment)	7.19697	2	6	2	1	528	53.345	9.42	0.896	5.44679	0.67
87	IPI00003925.6	P11177	PDHB	Isoform 1 of Pyruvate dehydrogenase E1 component subunit beta, mitochondrial	3.06407	1	1	1	1	359	39.208	6.65	0.136	1.68829	0.67
88	IPI00449049.5	P09874	PARP1	Poly [ADP-ribose] polymerase 1	9.36884	8	10	8	1	1014	113.012	8.88	0.389	15.9347	0.66
89	IPI00056357.3	Q969H8	C19orf10	UPF0556 protein C19orf10	8.67052	1	1	1	1	173	18.783	6.68	0.389	0	0.65
90	IPI00027422.2	P16144	ITGB4	Isoform Beta-4C of Integrin beta-4	1.97585	3	3	3	1	1822	202.039	6.09	0.064	1.60838	0.65
91	IPI00152981.1	Q9H845	ACAD9	Acyl-CoA dehydrogenase family member 9, mitochondrial	3.54267	3	4	3	1	621	68.717	7.96	0.184	7.06142	0.64
92	IPI00011454.1	Q14697	GANAB	Isoform 2 of Neutral alpha-glucosidase AB	12.7329	11	20	1	1	966	109.369	6.24	0.778	26.1147	0.64
93	IPI00784044.1	Q9HCC0	MCCC2	Isoform 1 of Methylcrotonoyl-CoA carboxylase beta chain, mitochondrial	3.90764	2	2	2	1	563	61.294	7.68	0.141	2.90704	0.64
94	IPI00014213.1	Q15031	LARS2	Probable leucyl-tRNA synthetase, mitochondrial	1.10742	1	1	1	1	903	101.911	8.22	0.045	2.02334	0.64
95	IPI00008986.1	Q01650	SLC7A5	Large neutral amino acids transporter small subunit 1	6.31164	2	7	2	1	507	54.974	7.72	0.413	13.6537	0.63
96	IPI00924788.2	Q6PIU2	NCEH1	neutral cholesterol ester hydrolase 1 isoform a	2.67857	1	2	1	1	448	49.85	7.21	0.096	0	0.63
97	IPI00294834.6	Q12797	ASPH	Isoform 1 of Aspartyl/asparaginyl beta-hydroxylase	3.0343	2	2	2	1	758	85.809	5.01	0.129	2.12245	0.63
98	IPI00413817.3	Q9NRX5	SERINC1	Serine incorporator 1	2.86976	1	1	1	1	453	50.461	5.85	0.122	0	0.62
99	IPI00004962.2	O00461	GOLIM4	Golgi integral membrane protein 4	9.1954	6	8	6	1	696	81.831	4.77	0.52	14.7881	0.62
100	IPI00296394.2	Q9UIG8	SLCO3A1	Isoform 1 of Solute carrier organic anion transporter family member 3A1	1.5493	1	1	1	1	710	76.503	6.73	0.093	0	0.61
101	IPI00030131.3	P42167	TMPO	Isoform Beta of Lamina-associated polypeptide 2, isoforms beta/gamma	11.0132	4	5	2	1	454	50.639	9.38	0.425	4.46148	0.61
102	IPI00384280.5	Q9UHG3	PCYOX1	Prenylcysteine oxidase 1	2.37624	1	1	1	1	505	56.604	6.18	0.083	0	0.61
103	IPI00879004.1	P11388	TOP2A	Isoform 4 of DNA topoisomerase 2-alpha	1.92308	3	4	3	1	1612	182.567	8.63	0.074	3.73728	0.6
104	IPI00383581.4	Q14697	GANAB	cDNA FLJ61290, highly similar to Neutral alpha-glucosidase AB	12.5628	11	20	1	1	995	112.855	6.06	0.778	26.4059	0.59
105	IPI00386755.2	Q96HE7	ERO1L	ERO1-like protein alpha	5.55556	2	2	2	1	468	54.358	5.68	0.172	0	0.58
106	IPI00219673.6	Q9Y2Q3	GSTK1	Isoform 1 of Glutathione S-transferase kappa 1	7.07965	1	1	1	1	226	25.48	8.41	0.166	0	0.56
107	IPI00006099.1	Q14692	BMS1	Ribosome biogenesis protein BMS1 homolog	0.858034	1	1	1	1	1282	145.716	6.44	0.035	1.67588	0.54
108	IPI00909582.2	P51659	HSD17B4	peroxisomal multifunctional enzyme type 2 isoform 1	4.73062	3	5	3	1	761	82.973	8.76	0.162	7.33876	0.54
109	IPI00009841.6	Q01844	EWSR1	RNA-binding protein EWS isoform 1	2.118	1	1	1	1	661	68.923	9.29	0.105	0	0.53
110	IPI00005154.1	Q08945	SSRP1	FACT complex subunit SSRP1	2.11566	1	1	1	1	709	81.024	6.87	0.059	0	0.5
111	IPI00305064.2	P16070	CD44	Isoform 1 of CD44 antigen	2.15633	1	5	1	1	742	81.487	5.33	0.145	0	0.47
